# Supplementary material for: First Assessment of the Sex Ratio for an East Pacific Green Sea Turtle Foraging Aggregation: Validation and Application of a Testosterone ELISA
Source: PubMed Central journal article supplement (PMC4605721; doi:10.1371/journal.pone.0138861), 2015-10-14
Supplement: pone.0138861.s001.pdf [file pone.0138861.s001.pdf]

### ENZO Testosterone Plate Layout

|             |                      |    |    |    |    |    |    |    |     |                       |              |
|-------------|----------------------|----|----|----|----|----|----|----|-----|-----------------------|--------------|
| A1<br>Blank | A2<br>Std 5          | A3 | A4 | A5 | A6 | A7 | A8 | A9 | A10 | A11                   | A12<br>Std 4 |
| B1<br>TA    | B2<br>Std 6          | B3 | B4 | B5 | B6 | B7 | B8 | B9 | B10 | B11                   | B12<br>Std 3 |
| C1<br>NSB   | C2<br>Std 7          | C3 | C4 | C5 | C6 | C7 | C8 | C9 | C10 | C11<br>Low Control    | C12<br>Std 2 |
| D1<br>Bo    | D2<br>Low Control    | D3 | D4 | D5 | D6 | D7 | D8 | D9 | D10 | D11<br>Medium Control | D12<br>Std 1 |
| E1<br>Std 1 | E2<br>Medium Control | E3 | E4 | E5 | E6 | E7 | E8 | E9 | E10 | E11<br>High Control   | E12<br>Bo    |
| F1<br>Std 2 | F2<br>High Control   | F3 | F4 | F5 | F6 | F7 | F8 | F9 | F10 | F11<br>Std 7          | F12<br>NSB   |
| G1<br>Std 3 | G2                   | G3 | G4 | G5 | G6 | G7 | G8 | G9 | G10 | G11<br>Std 6          | G12<br>TA    |
| H1<br>Std 4 | H2                   | H3 | H4 | H5 | H6 | H7 | H8 | H9 | H10 | H11<br>Std 5          | H12<br>Blank |

Kit Lot #: \_\_\_\_\_ Exp. Date: \_\_\_\_\_ Date Run: \_\_\_\_\_ Tech: \_\_\_\_\_

1<sup>st</sup> Incubation: Start time: \_\_\_\_\_

Notes: \_\_\_\_\_

2<sup>nd</sup> Incubation: Start time: \_\_\_\_\_

End time: \_\_\_\_\_

3<sup>rd</sup> Incubation: Start time: \_\_\_\_\_

End time: \_\_\_\_\_

Pipette Calib 100 uL mili-Q H<sub>2</sub>O = \_\_\_\_\_ g Pipette: \_\_\_\_\_

Pipette Calib 40 uL mili-Q H<sub>2</sub>O = \_\_\_\_\_ g Pipette: \_\_\_\_\_
